# Supplementary material for: Cancer proteome and metabolite changes linked to SHMT2
Source: PubMed Central journal article supplement (PMC7480864; doi:10.1371/journal.pone.0237981), 2020-09-09
Supplement: pone.0237981.s001.pdf [file pone.0237981.s001.pdf]

# Supporting information for Blots

## Protocol for western blot analysis

For western blotting analysis, cells on plates were washed in cold PBS twice and lysed in NP40 lysis buffer (50 mM Tris/HCl pH7.5, 100 mM NaCl, 1% NP40, 0.1% sodium deoxycholate, 10% glycerol, 1mM EDTA, 100 mM NaF, 1 mM sodium orthovanadate, protease inhibitor tablets-EDTA-free (Thermo Fisher Scientific)) and rocked for 30 min at 4°C.

For western blotting analysis of xenograft tissues, a fragment of xenograft tumors was chopped to pieces. NP40 lysis buffer was used (roughly 200 µL to 10 mg of tissues) to lyse tissues for 1 hour at 4°C.

Insoluble cell or tissue debris was removed by centrifuging at 18000 g for 10 min at 4 °C and protein amounts were measured by using Pierce BCA Protein Assay Kit (Thermo Fisher Scientific). Lysates were diluted to 2 mg protein/ml and added equal volume of 2xSDS Laemmli sample buffer.

Total cell or tissue lysates (10 µg protein/10 µl sample/lane) were separated by SDS-PAGE (routinely 15 well gel) and electro-transferred onto nitrocellulose membranes (Thermo Fisher Scientific). The membrane then was blocked in 1× TBS buffer (Bio Basic) and 0.1% Tween-20 (TBST buffer) with 5% (weight / volume) non-fat milk (Bio-Rad). Primary antibodies (1:1000 to 1:5000 dilution) were added to TBST buffer with 1% (weight / volume) non-fat milk and the membrane was incubated at 4 °C overnight. After washing with TBST buffer, the secondary antibody was added at 1:5000 to 1:10000 dilution and incubated for 1 hour at room temperature. Anti-rabbit or anti-mouse IgG 2<sup>nd</sup> antibodies with HRP conjugate or with DyLight™ 800 4xPEG conjugate or 680 conjugate were purchased from Cell Signaling Tech. After three to four washes, Luminata Forte Western HRP substrate was used for HRP conjugate 2<sup>nd</sup> antibody blot. Chemiluminescence or fluorescence on membrane was recorded by IS (Image Studio) program in Odyssey Fc imaging instrument (LI-COR) according to manufacturer's instruction, and imaging files were export as .tif or .png format with 300 dpi resolution for record.

## Notes:

1. Nitrocellulose membrane with protein transferring was cut into small pieces or stripes according to the detection of targeted proteins. This practice will reduce the consumption of 1<sup>st</sup> and 2<sup>nd</sup> antibodies and uneven background. For example, the molecular weight of Actin is 42 kDa, so blot around 40 kDa protein marker band was cut for anti-Actin blot.
2. Blue protein standard bands (Thermo or Bio-Rad products) were recorded at 700 nm fluorescence channel and overlaid on chemiluminescence channel or 800 nm fluorescence channel blot.
3. Regions outside of blot in original .tif file were routinely cropped to reduce the size of files for achieve by Adobe Photoshop® program.
4. All relevant samples in a figure result were run on the same gel, and any adjustments to improve visibility of the data were applied to the entire image.

**Fig 1B**

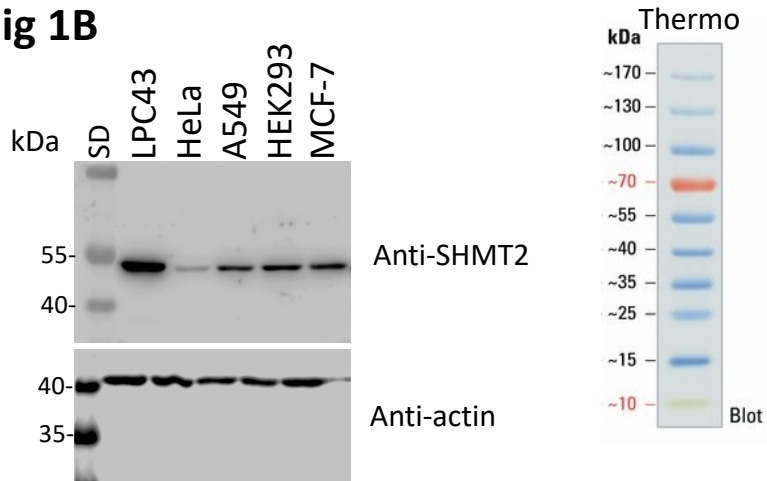

**Fig 1C**

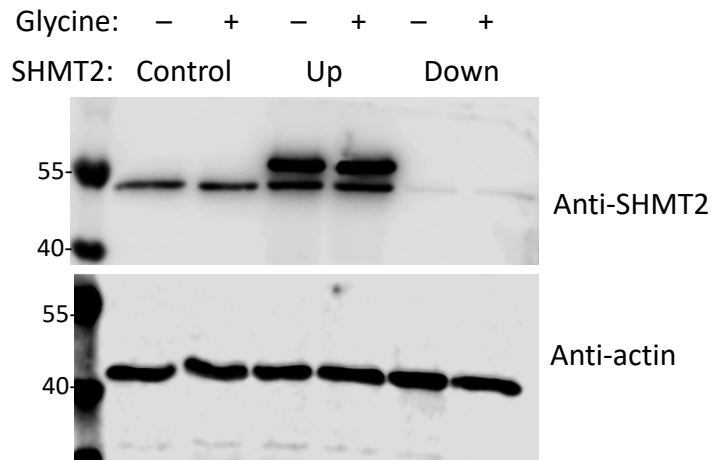

**Fig 1D insert**

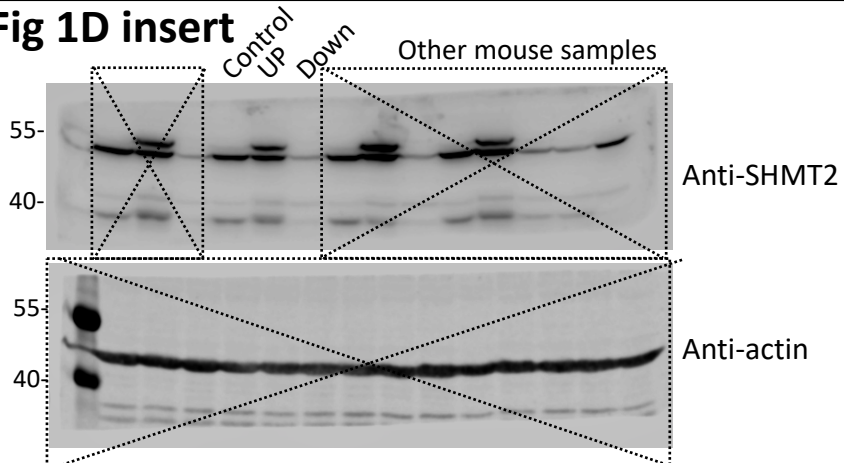

**Fig 2A**

Ectopic  
BirA\*-flag protein:

Control      SHMT2      CHCHD2

Tet:      -    +      -    +      -    +

Bio-Rad

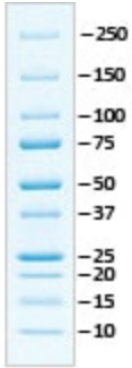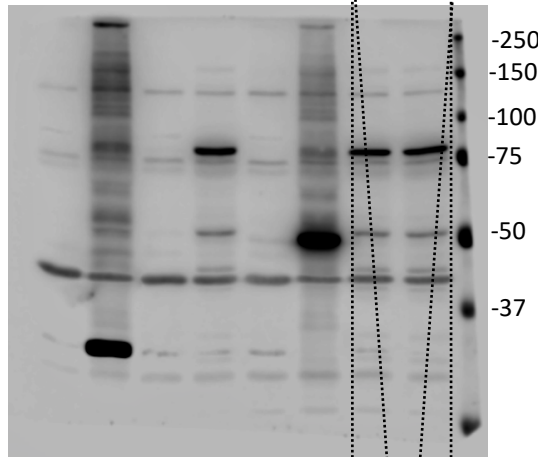

Blot:  
Streptavidin-  
HRP

SHMT2-BirA\*-flag →  
CHCHD2-BirA\*-flag →  
BirA\*-flag →

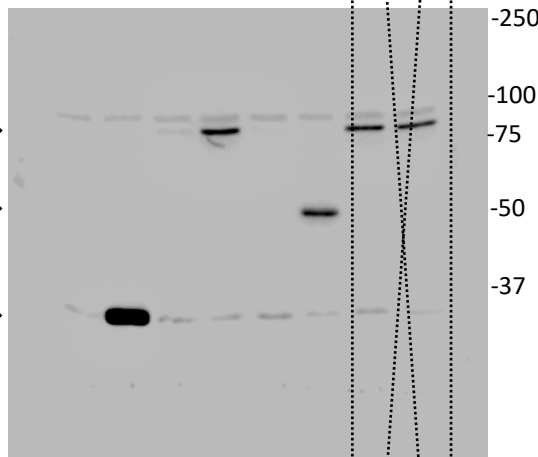

Anti-flag

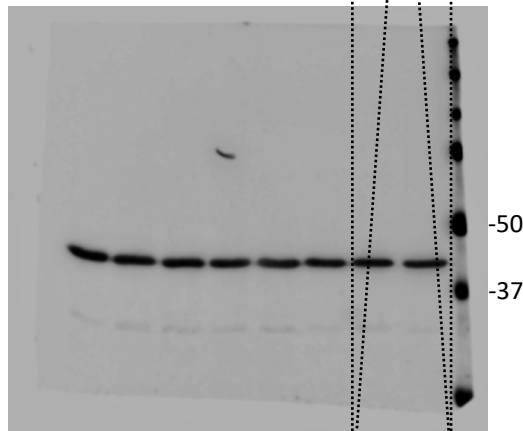

Anti-Actin

Whole cell lysate

SD

**Fig 2D**

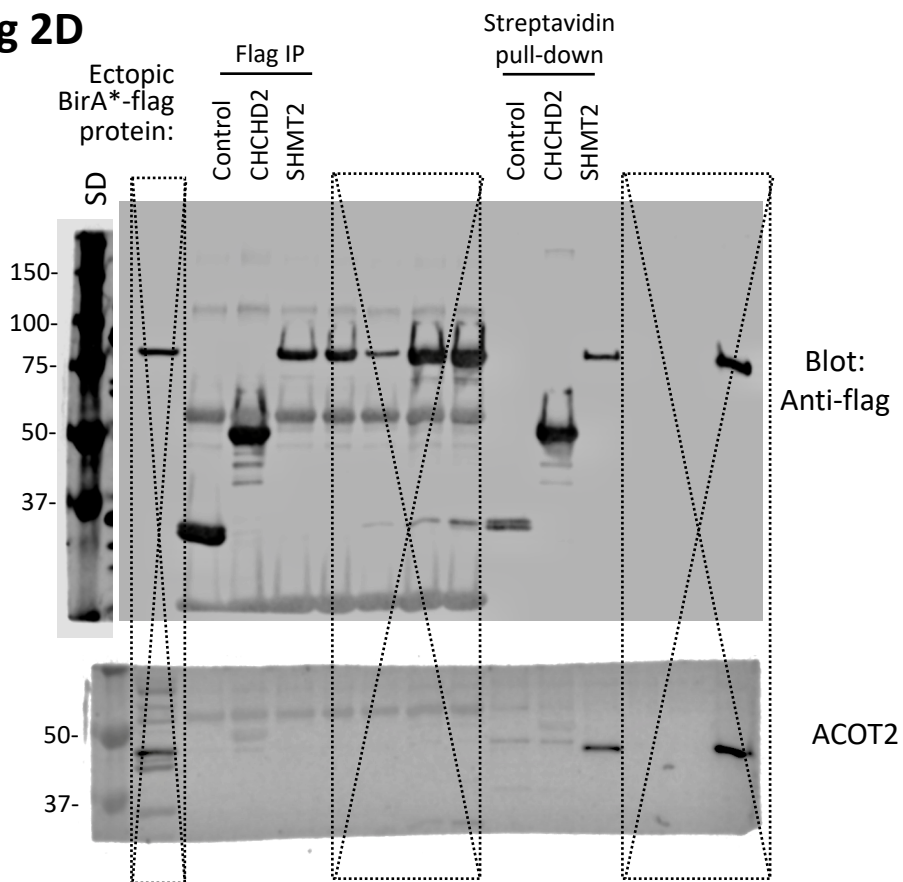

### S1A Fig

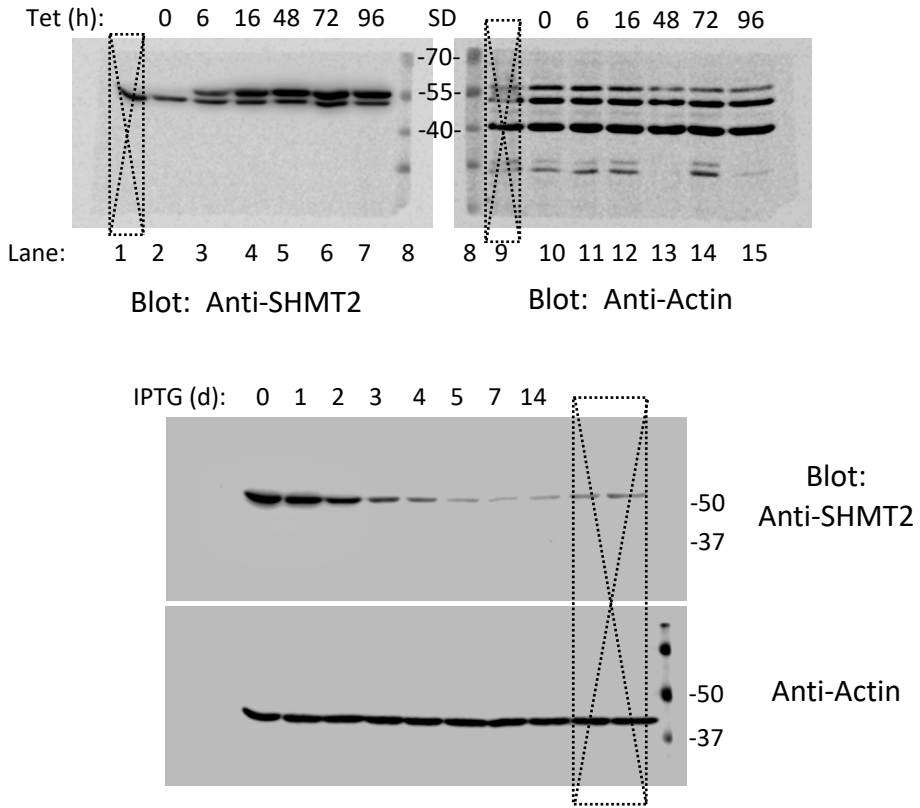

### S1D Fig

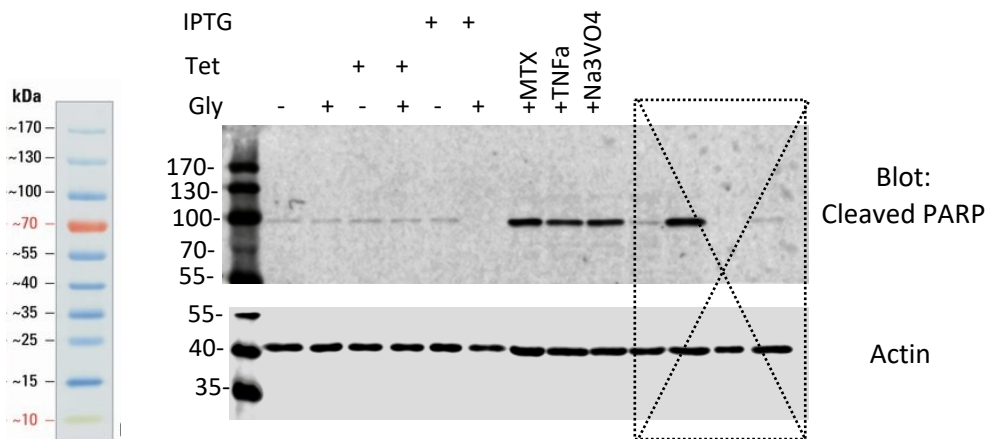

## S2A Fig

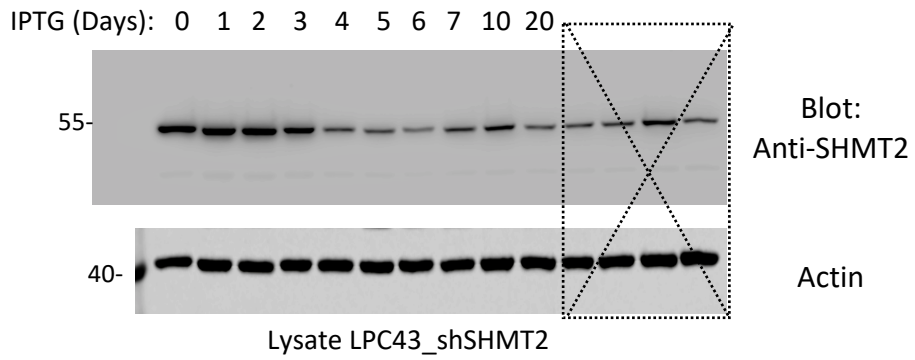

## S5B Fig

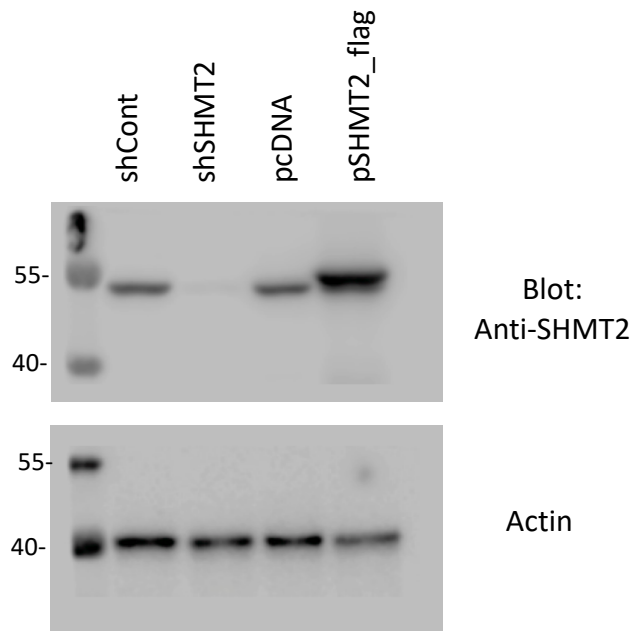

**S8 Fig**

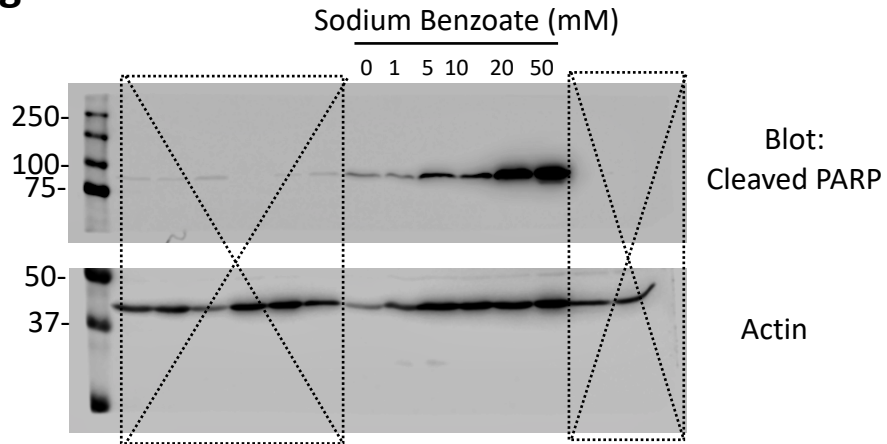

**S10A Fig**

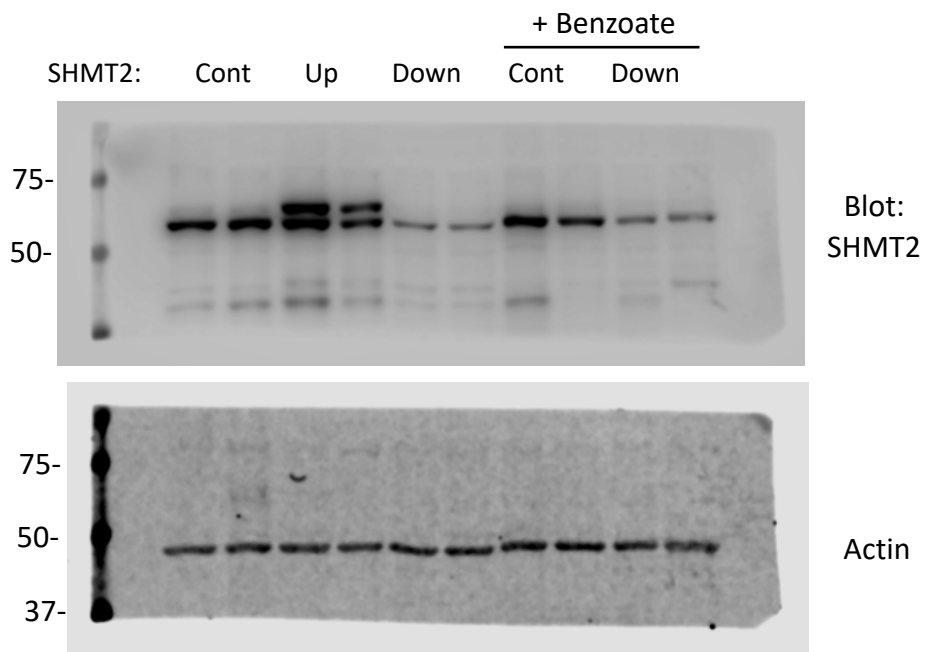

**S14 Fig**

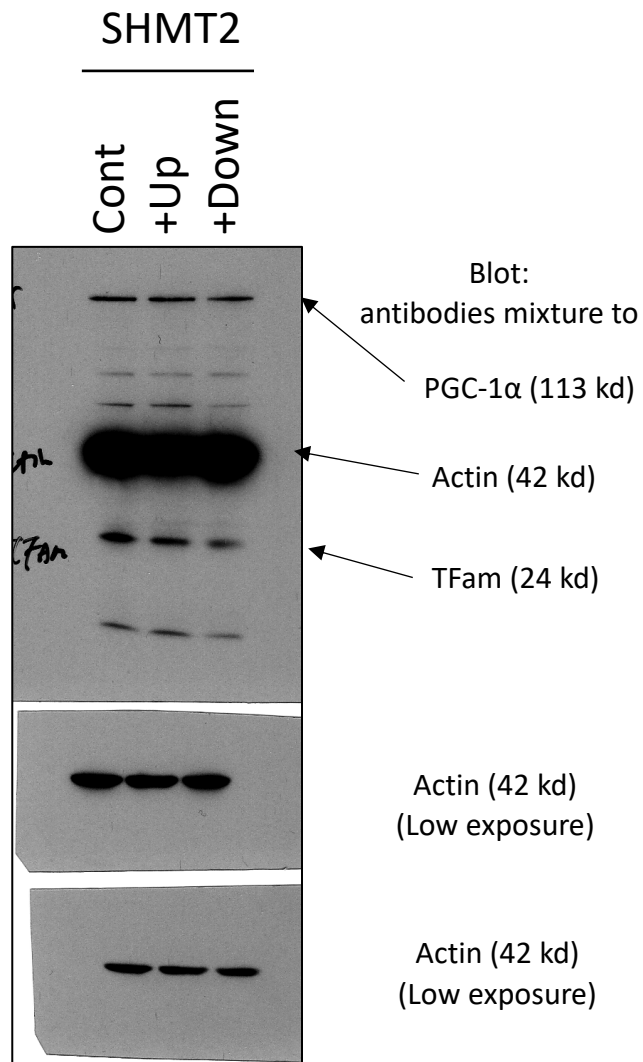

Note: This western blot was developed on film.
