# Supplementary material for: Cancer proteome and metabolite changes linked to SHMT2
Source: PubMed Central journal article supplement (PMC7480864; doi:10.1371/journal.pone.0237981), 2020-09-09

A

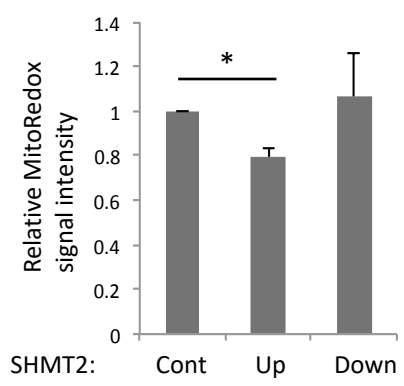

B

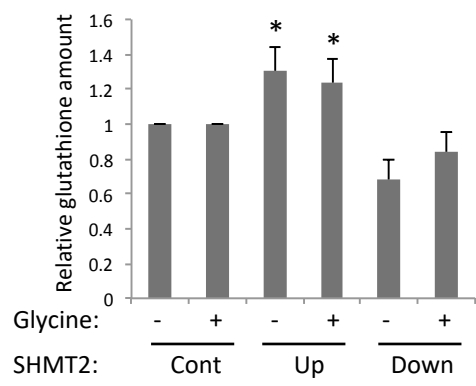

Supplement: pone.0237981.s015.pdf [file pone.0237981.s015.pdf]
